# Supplementary material
Source: PubMed Central journal article supplement (PMC8756375)
Supplement: NIHMS1764655-supplement-SuppTab1.pdf [file NIHMS1764655-supplement-SuppTab1.pdf]

**Supplementary Table 1. Interaction Terms between Race and Other Covariates**

| <b>Interaction Term*</b>                                                                                                                                           | <b>Odds Ratio (95% CI)</b> | <b>P-value</b> |
|--------------------------------------------------------------------------------------------------------------------------------------------------------------------|----------------------------|----------------|
| Child 's Age (Years) X Child's Race (Ref = Non- Black)                                                                                                             | 0.94 (0.82-1.07)           | 0.38           |
| Parent's Education (Ref = <= High School) X Child's Race (Ref = Non- Black)                                                                                        | 1.08 (0.94-1.25)           | 0.28           |
| Has your child ever been to the dentist or a dental clinic? (Ref = No) X Child's Race (Ref = Non- Black)                                                           | 0.97 (0.83-1.34)           | 0.73           |
| During the past 12 months, did your child receive care at a dental office or clinic because of a cavity or toothache? (Ref = No) X Child's Race (Ref = Non- Black) | 0.84 (0.68-1.03)           | 0.10           |
| ECOHIS (Child's Experience) X Child's Race (Ref = Non- Black)                                                                                                      | 0.94 (0.87-1.01)           | 0.09           |
| ECOHIS (Parent/Caregiver's Experience) X Child's Race (Ref = Non- Black)                                                                                           | 0.98 (0.89-1.08)           | 0.74           |
| How much of a problem would you say that lack of access to adequate food shopping is in your neighborhood? (Ref = No Problem) X Child's Race (Ref = Non- Black)    | 1.10 (0.95-1.28)           | 0.19           |

\* The interaction terms was added one at a time with all the covariates listed in Table 5
